# Supplementary figures and images for: Comparison of the Interlaminar and Transforaminal Approaches for Full-endoscopic Discectomy for the Treatment of L4/5 Lumbar Disc Herniation
Source: PubMed Central journal article supplement — Neurol Med Chir (Tokyo). 2023 May 11;63(7):313–20. doi: 10.2176/jns-nmc.2022-0357 (PMC10406458; doi:10.2176/jns-nmc.2022-0357), 2023-05-11

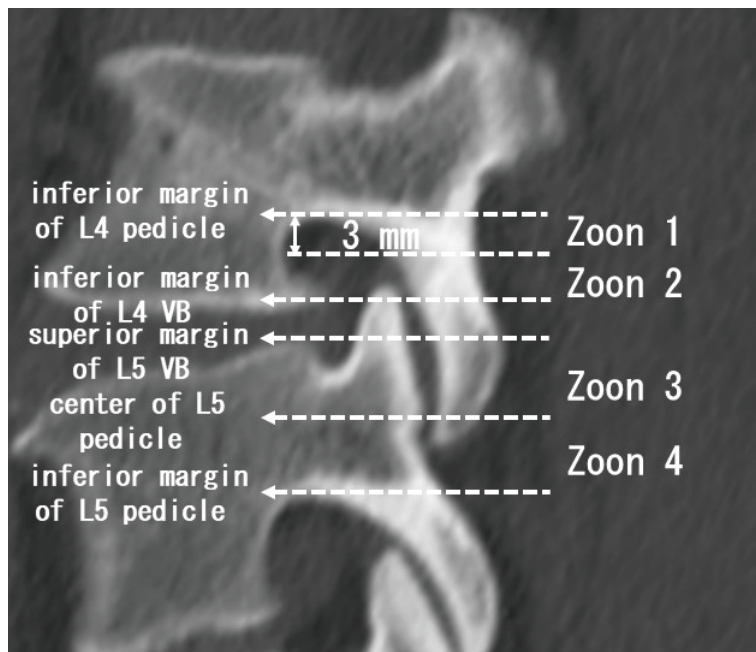

Supplement: 1349-8029-63-0313-s001.pdf [file 1349-8029-63-0313-s001.pdf]
